# Supplementary material
Source: bioRxiv or medRxiv preprint supplement (https://www.biorxiv.org/highwire/filestream/60243/field_highwire_adjunct_files/0/196022-1.pdf)
Supplement: Supplementary file [file 196022-1.pdf]

# An unbiased reconstruction of the T helper cell type 2 differentiation network

## - Supplementary Figures

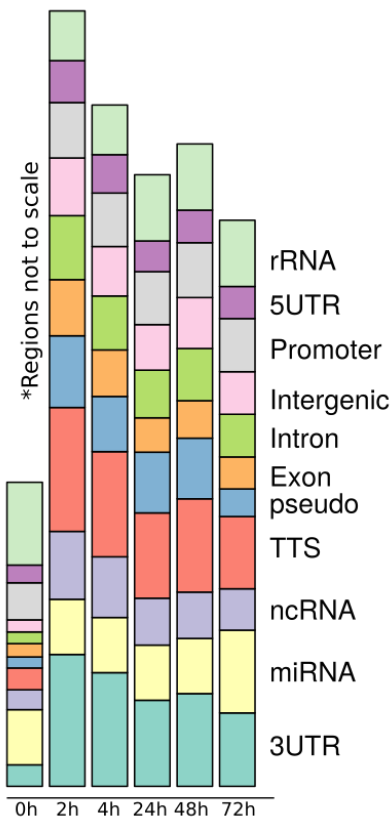

**Supplementary Figure 1:** Number of detected ATAC peaks at different time points (union over replicates), broken down into categories as reported by MACS2. Smaller categories have been amplified to highlight their dynamics
